## Metagenomic next-generation sequencing to characterize etiologies of non-malarial fever in a cohort living in a high malaria burden area of Uganda

Lusajo Mwakibete<sup>1,\*</sup>, Saki Takahashi<sup>2,\*†</sup>, Vida Ahyong<sup>1</sup>, Allison Black<sup>1</sup>, John Rek<sup>3</sup>, Isaac Ssewanyana<sup>3</sup>, Moses Kanya<sup>3,4</sup>, Grant Dorsey<sup>2</sup>, Prasanna Jagannathan<sup>5,6</sup>, Isabel Rodríguez-Barraquer<sup>2,§</sup>, Cristina M. Tato<sup>1,§</sup>, Bryan Greenhouse<sup>2,§</sup>

<sup>1</sup>Chan Zuckerberg Biohub, San Francisco, CA, USA

<sup>2</sup>Division of HIV, ID, and Global Medicine, Department of Medicine, University of California San Francisco, San Francisco, CA, USA

<sup>3</sup>Infectious Diseases Research Collaboration, Kampala, Uganda

<sup>4</sup>Department of Medicine, Makerere University, Kampala, Uganda

<sup>5</sup>Department of Medicine, Stanford University

<sup>6</sup>Department of Microbiology and Immunology, Stanford University

\*Equal contribution

§Equal contribution

†Correspondence to: [saki.takahashi@ucsf.edu](mailto:saki.takahashi@ucsf.edu)

### Abstract

**Background:** Causes of non-malarial fevers in sub-Saharan Africa remain understudied. We hypothesized that metagenomic next-generation sequencing (mNGS), which allows for broad genomic-level detection of infectious agents in a biological sample, can systematically identify potential causes of non-malarial fevers.

**Methods and Findings:** The 212 participants in this study were of all ages and were enrolled in a longitudinal malaria cohort in eastern Uganda. Between December 2020 and August 2021, respiratory swabs and plasma samples were collected at 313 study visits where participants presented with fever and were negative for malaria by microscopy. Samples were analyzed using CZ ID, a web-based platform for microbial detection in mNGS data. Overall, viral pathogens were detected at 123 of 313 visits (39%). SARS-CoV-2 was detected at 11 visits, from which full viral genomes were recovered from nine. Other prevalent viruses included Influenza A (14 visits), RSV (12 visits), and three of the four strains of seasonal coronaviruses (6 visits). Notably, 11 influenza cases occurred between May and July 2021, coinciding with when the Delta variant of SARS-CoV-2 was circulating in this population. The primary limitation of this study is that we were unable to estimate the contribution of bacterial microbes to non-malarial fevers, due to the difficulty of distinguishing bacterial microbes that were pathogenic from those that were commensal or contaminants.

**Conclusions:** These results revealed the co-circulation of multiple viral pathogens likely associated with fever in the cohort during this time period. This study illustrates the utility of mNGS in elucidating the multiple causes of non-malarial febrile illness. A better understanding of the pathogen landscape in different settings and age groups could aid in informing diagnostics, case management, and public health surveillance systems.

## Introduction

Fever is a frequent disease manifestation and a common reason for seeking health care services in resource-limited settings. Fever has many underlying etiologies, including infection with a broad array of pathogens such as malaria caused by the *Plasmodium falciparum* protozoan parasite, as well as other parasites, viruses, and bacteria. Given the non-specific disease presentation, determining etiologies of fever based solely on clinical examination is difficult, and therefore diagnostic testing is needed. For malaria, a major cause of morbidity and mortality in Africa[1], recent increases in point-of-care and laboratory diagnostic testing have led to demonstrable improvements in malaria case management[2]. However, there are sustained knowledge gaps on fever etiologies that do not result in a malaria diagnosis due to the lack of testing availability for other pathogens, and the relative burden of other emerging pathogens of global importance (e.g., arboviruses) remains largely uncharacterized. The acquisition of clinical immunity to *P. falciparum* further confounds the study of fever etiologies in malaria-endemic settings. Individuals acquire clinical immunity against malaria over repeated infections, leading to the ability to tolerate malaria parasites in the blood without developing fever[3]. In individuals with parasitemia who have acquired high levels of clinical immunity, *P. falciparum* is unlikely to be the cause of febrile illness. Taken together, the limited availability of diagnostics for pathogens beyond malaria results in many undiagnosed illnesses[4], missed opportunities for targeted treatments[5], unnecessary empiric use of antibiotics[6], and public health surveillance systems that provide an incomplete picture of the pathogen landscape[7].

Direct pathogen detection platforms such as metagenomic next-generation sequencing (mNGS) can be harnessed to meet this multifaceted challenge of identifying non-malarial fever etiologies. mNGS allows for the broad and unbiased genomic-level detection of infectious agents in a biological sample. This powerful technology has played a key role in disparate fields including clinical diagnostics[8], microbiome characterization[9], outbreak detection[10,11], and transcriptomics[12]. As highlighted in a recent review piece by Ko and colleagues[13], multiplexed pathogen testing can be particularly advantageous in resource-constrained settings, as a single assay can generate information about a suite of microbes in a sample. Recent mNGS studies in Uganda[14], Kenya[15], and Cambodia[11] have revealed new insights into the local patterns of infectious etiologies of non-specific disease presentations including fever and pneumonia. As recently underscored by the SARS-CoV-2 pandemic, unbiased disease surveillance can also provide insight with regard to incidence of newly emerging infections, especially in geographies where implementation of widespread, disease-specific diagnostics is constrained by competing demands on resources[16]. In addition to identifying the microbial composition of a sample, a key strength of the mNGS approach is the possibility to generate partial or whole pathogen genomes for downstream epidemiologic and genomic investigations. In particular, RNA mNGS allows for capturing all present, actively replicating microbes at their respective abundances to understand and identify potential causative agents (in contrast to DNA mNGS, which would only identify microbes with DNA and miss microbes such as RNA viruses, and without their relative abundances).

Here, we performed RNA mNGS to systematically study the potential causes of non-malarial febrile illness within a well-characterized, multi-generational, representative cohort of individuals living in an area with high malaria burden in eastern Uganda. Given the timing of this study, which ran from December 2020 to August 2021, we were also uniquely situated to detect SARS-CoV-2 infections and the co-circulation of multiple respiratory viral pathogens during this time period.

## Methods

### *Study population and design*

This pilot study was nested within the ongoing Program for Resistance, Immunology, Surveillance, and Modeling of Malaria in Uganda (PRISM) Border Cohort study in the Tororo and Busia districts of Uganda. The design and population of this cohort study have recently been described elsewhere[17]. Briefly, all households in the parishes of Osukuru (Tororo district), Kayoro (Tororo district), and Buteba (Busia district) were enumerated to generate a sampling frame to recruit households into the study. In August 2020, households were randomly selected and screened for eligibility to participate. Inclusion criteria for a household to participate included having at least two members aged 5 years or younger. All permanent members of an enrolled household who met eligibility criteria were screened for enrollment. The cohort was dynamic, so any permanent members that joined an enrolled household were screened for enrollment.

The approximately 500 participants from the 80 households enrolled in the cohort were encouraged to come to a dedicated study clinic open 7 days a week for all of their medical care free of charge and were reimbursed for their transport costs, minimizing barriers to accessing care. Routine study visits were conducted every 4 weeks, and included a standardized evaluation and blood collection by finger prick or heel stick (if < 6 months of age) or by venipuncture (if 6 months of age and older). At each study visit where participants reported a fever or history of fever in the last 24 hours, testing for asexual malaria parasites was performed by microscopic examination of a thick blood smear. Participants were diagnosed with malaria if positive and managed according to national guidelines[18]; the incidence of malaria in the cohort was approximately 1 to 3 episodes per person per year in children, and lower in adults[17]. In addition, a sample was collected for subsequent testing via ultrasensitive qPCR for *Plasmodium falciparum* malaria[19].

Participants were eligible for this pilot mNGS study if they had a fever or rash, accompanied by a negative malaria blood smear result. Participants of all ages were included. Individuals meeting these criteria, but who were positive for malaria by qPCR, were included. Our expectation was that submicroscopic parasitemia would be prevalent in this setting and unlikely to be the source of the febrile illness. For each participant visit that met these criteria, we obtained a combined OP/mid-turbinate swab and 200  $\mu$ L of plasma, each collected directly into separate cryovials containing DNA/RNA Shield transport and storage media, and frozen at -80°C. For a minority of visits, only one of the sample types was collected.

The study protocol was reviewed and approved by the Makerere University School of Medicine Research and Ethics Committee, the Uganda National Council of Science and Technology, the University of California, San Francisco Human Research Protection Program, the London School of Hygiene & Tropical Medicine Ethics Committee, and the Stanford University Research Compliance Office. Written informed consent was obtained for all participants prior to enrolment into the study.

### *mNGS sample processing and sequencing*

For each collected sample, nucleic acid was extracted using the quick-DNA/RNA Pathogen MagBead kit (Zymo Research). Extracted nucleic acid was treated with DNase to isolate RNA alone and run on a TapeStation for quality control to examine RNA integrity. Water controls were used to characterize background contamination, as well as 25 pg of a positive control

spike-in (RNA standard dilution series from External RNA Controls Consortium (ERCC)). Plate maps were designed to detect and minimize cross-contamination between wells by interspersing samples and water controls. Samples were run in two experimental batches (see **Supplementary Table 1**). FastSelect -rRNA HMR (Qiagen) was used for human RNA ribosomal depletion. RNA was reverse-transcribed to attain cDNA, which was used to construct and barcode sequencing libraries using the NEBNext Ultra II Library Prep Kit (New England Biolabs). The RNA sequencing libraries underwent 150-nt paired-end Illumina sequencing.

#### *mNGS bioinformatic analysis using CZ ID*

We used the CZ ID bioinformatics pipeline v6.8 (<http://czid.org>), an established, open-source sequencing analysis platform for raw mNGS data which enables the detection and taxonomic identification of microbes[20]. Briefly, the pipeline filters out reads mapping to the human host (using *STAR*[21]) and removes low-quality (using *Price Seq*[22]), low-complexity (*LZW*), and duplicate reads as well as adapter sequences (using *Trimmomatic*[23]). The final composition of reads in each sample was determined by querying the remaining reads on NCBI's nucleotide (NT) and non-redundant protein (NR) databases using the *GSNAP-L*[24] and *RAPSearch2*[25] programs, respectively.

For each sample, significant microbial detections were determined from the unique reads per million (rPM) that mapped to specific microbial taxa, genera, and species. To do so, we applied the following four threshold filters to determine the presence of a microbe in a sample: nucleotide (NT) Z-score  $\geq 1$  (calculated from the mass-normalized background model created on CZ ID using the water controls), NT rPM  $\geq 10$ , non-redundant protein (NR) rPM  $\geq 5$ , and average NT alignment  $\geq 50$  base pairs. We conservatively excluded the bacterial reads in samples with low input ( $< 25$  pg) because of the potential amplification of background contaminants from reagents and/or the environment (see **Supplementary Figure 1**).

#### *Alignment pipelines for generating consensus viral genomes*

**SARS-CoV-2:** Consensus viral genomes were obtained using CZ ID's consensus genome pipeline v3.4.7. Non-host reads from each of the 11 samples in which SARS-CoV-2 was detected by CZ ID were aligned to the SARS-CoV-2 Wuhan-Hu-1 reference genome (MN908947.3) using *minimap2*[26]. Aligned reads were trimmed using *trim galore*[27] and adapters, low-quality reads (Phred quality score  $< 20$ ), and short sequences ( $< 20$  base pairs) were removed. Trimmed reads were then again aligned to MN908947.3 using *minimap2*, primers were trimmed using *iVar* v1.3.1[28,29], and consensus genomes were generated using *iVar consensus*. Bases were called if they had a depth of  $\geq 10$  reads. Bases that were not called were identified as N, and SNPs were called using *samtools* v1.9 and *bcftools* v1.9. In total, 9 SARS-CoV-2 consensus genomes were obtained with  $\geq 90\%$  coverage breadth.

**Influenza A virus:** FASTQ files of the reads mapping to Influenza A from the 14 samples in which Influenza A was detected by CZ ID were downloaded. As all of the Influenza A reads were of the H3N2 subtype, reads were mapped to the Influenza A H3N2 reference genome from NCBI (GenBank Accession: 1559708)[30] using Geneious Prime 2022.1.1. The software was used to map reads and to obtain consensus genomes. Geneious was used rather than the CZ ID consensus genome pipeline (as we did for SARS-CoV-2 and RSV) because the Influenza A virus genome has multiple segments, thus requiring separate alignments to each segment for every sample. Nucleotide base calling required at least 90% similarity across the reads per respective position, and bases were called if they had a depth of  $\geq 10$  reads. In total, 9 Influenza A consensus HA genes were obtained with  $\geq 80\%$  coverage breadth.

**Respiratory syncytial virus (RSV):** Similarly as for SARS-CoV-2, CZ ID's consensus genome pipeline v3.4.7 was used to obtain consensus viral genomes from the 12 samples in which RSV was detected by CZ ID (11 samples were of the RSV-A subtype and 1 sample was of the RSV-B subtype). The very low read count of the latter, the sole plasma sample and with only 19 NT reads, precluded generation of a consensus genome. Non-host reads from each sample were aligned to their closest RSV-A reference genome based on genetic similarity and coverage depth. These reference genomes varied between samples; the ones used were NCBI Accession: MN306017.1, KY967363.1, KY654513.1 and KC731482.1. As before, aligned reads were trimmed using *trim galore* and adapters, low-quality reads (Phred quality score < 20), and short sequences (< 20 base pairs) were removed. Bases were called if they had a depth of  $\geq 5$  reads, the default setting on the CZ ID pipeline. Bases that were not called were identified as N, and SNPs were called using *samtools* and *bcftools*. In total, 9 RSV consensus genomes were obtained with  $\geq 90\%$  coverage breadth.

### *Reconstructing viral phylogenies*

The Nextstrain platform[31] was used to perform phylogenetic inference of the SARS-CoV-2, Influenza A, and RSV genomes obtained from this analysis. To ensure proper contextualization of the sequences generated as part of this study, we sourced publicly available sequence data from relevant GISAID databases, as described below.

To analyze SARS-CoV-2 sequences, we downloaded all SARS-CoV-2 genome sequences available from the GISAID EpiCoV database[32]. Within our Nextstrain build, we specified that all sequences sampled from Uganda available on GISAID should be included in the phylogenetic analysis. Together with the SARS-CoV-2 genomes that we sequenced as part of this study, these Ugandan genomes formed our focal set. Contextual sequences from other countries were included in the analysis based on their genetic similarity to sequences in the focal set, with more genetically similar contextual sequences prioritized for inclusion in the analysis dataset. To retain the historical diversity of SARS-CoV-2 in our analysis, and to ensure accuracy of the molecular clock, an equitable number of contextual sequences were sampled per month across the entire duration of the pandemic. The final dataset used for phylogenetic analysis included 2,686 SARS-CoV-2 genomes sampled from December 2019 to November 2021, of which 687 were sampled from Uganda (including the 9 generated in this study).

To analyze Influenza A sequences, we downloaded all 9,193 Influenza A virus H3N2 HA sequences available on the GISAID EpiFlu database[33] from January 2020 to March 2022. Within our Nextstrain build, we specified that all sequences sampled from Africa available from EpiFlu should be included in the phylogenetic analysis, along with the Influenza A viruses sequenced as part of this study. Contextual sequences from other countries were included in the analysis; sub-sampling of contextual sequences by country, year and month was used to ensure global representation and accuracy of the molecular clock. The final dataset used for phylogenetic analysis consisted of 3,825 Influenza A HA sequences (including the 9 generated in this study).

To analyze RSV sequences, we downloaded all 677 RSV genomes available on the GISAID EpiRSV database[32] from January 2020 to February 2022. Within our Nextstrain build, we specified that all sequences sampled from Africa available from EpiRSV should be included in the phylogenetic analysis, along with the RSV viruses sequenced as part of this study. Contextual sequences from other countries were included in the analysis; sub-sampling of contextual sequences by country, year and month was used to ensure accuracy of the

molecular clock. The final dataset used for phylogenetic analysis consisted of 469 RSV genomes (including the 9 generated in this study).

We used Nextstrain Augur to perform a multiple sequence alignment of input sequences using *MAFFT*[34] and to strip the multiple sequence alignment to the reference genome, which removes sequence insertions that introduce gaps in the reference sequence. *IQ-TREE*[35] was used to generate a maximum likelihood genetic divergence tree. We generated temporally resolved trees using *TreeTime*[36]. Nextstrain phylogenetic trees were exported as JSON files by the pipeline, which we then visualized and explored in the web browser using Nextstrain Auspice. Figures were generated from SVG files of these visualized trees. All analysis was conducted using the R statistical software versions 4.0.2 and 4.1.3.

### *Data availability*

The SARS-CoV-2, Influenza A, and RSV genomes generated in this analysis were deposited in their respective GISAID databases (see **Supplementary Table 2** for accession numbers). The Nextstrain trees generated in this analysis are available on GitHub at:

<https://github.com/czbiohub/rapid-response-prism>. The SRA files of non-host reads associated with this analysis are available at:

<https://dataview.ncbi.nlm.nih.gov/object/PRJNA870959?reviewer=ud7dt1nbgo8ee3v2irp7v2pm0j>. CZ ID public links depicting the mNGS detections are available at:

<https://czid.org/pub/7pxmXbpFTL>, with a corresponding water background model called “PRISM 3 Final Water Background”. Note that while the two batches were separately processed for the analysis, for simplicity they have been combined in this public link.

## **Results**

### *Clinical, demographic, and geographic characteristics of participants*

Samples were collected for this study between December 2020 and August 2021. Of the 624 total febrile study visits in the cohort during the time period of this study, 357 had a negative test result for malaria parasites by blood smear. We were able to evaluate a large majority of these non-malarial febrile illnesses in this representative cohort. In addition, samples were obtained from 3 afebrile participants who had a rash, which was the other eligibility criteria for this study (**Supplementary Figure 2**). The characteristics of the study participants in this mNGS study are provided in **Table 1** and **Figure 1**. Overall, samples from 212 individuals from 80 households were included in this study, of whom 50% were < 5 years of age, 20% were between 5 and 15 years of age, and 30% were 16 years of age or older. 70% of individuals had sample collection at one visit, and the rest had sample collection at multiple visits (up to 5).

Sample collection was performed at a total of 313 study visits. Even though participants had to be parasite negative by blood smear to be eligible for this mNGS study, at a quarter of visits, participants were later found to be positive for *Plasmodium falciparum* by qPCR. The most frequently reported symptoms, in addition to fever, were cough, headache, and fatigue. Nearly all of the 297 swab samples and 294 plasma samples collected for this study passed CZ ID's QC filters and were included in this analysis, and most paired from the same visit.

### *Microbes detected by mNGS at visits with malaria blood smear-negative fever episodes*

We applied stringent threshold filters for detecting microbes in order to minimize the effects of noise introduced by low sample input and background contaminants. Bacterial, viral, and

eukaryotic microbes were detected at 92%, 47%, and 63% of the 313 visits, respectively (**Table 2**). We further examined 18 detected viruses that are known to be pathogenic to humans and have previously been causally linked to febrile disease, focusing on acute respiratory and gastrointestinal (GI) viral infections (**Supplementary Table 3**). Overall, 119 of the 313 visits (38%) had at least 1 respiratory viral pathogen detected, 5 visits had a GI viral pathogen detected, and 4 visits had more than 1 viral pathogen detected. The proportion of study visits with at least 1 viral pathogen detected decreased by age: 49% in participants < 5 years of age, 30% in participants 5-15 years of age, and 28% in participants 16 years of age or older. As the likelihood of viral pathogen detection depends on the sample type(s) tested, results at the 273 visits with paired sample collection are presented in Table 2.

Of the 273 visits with plasma-swab pairs tested by mNGS, 62 were previously characterized as positive for *Plasmodium falciparum* malaria by qPCR in the cohort study, of which 22 were also positive by mNGS. *Plasmodium falciparum* malaria was detected by mNGS in an additional 35 visits (**Table 3** and **Supplementary Table 4**). Overall, 73% of *Plasmodium falciparum* malaria results were in agreement between qPCR and mNGS. In addition, we found a positive relationship between parasite density values obtained from qPCR and NT rPMs mapping to *Plasmodium falciparum* by mNGS among the 40 plasma samples with non-zero values on both assays (**Supplementary Figure 3**). All samples with greater than 13.4 parasites per  $\mu\text{L}$  by qPCR were positive for *Plasmodium falciparum* by mNGS. 19 of the 34 visits that were qPCR negative and mNGS positive had at least 1 positive blood smear or qPCR result within the 3 months before or after the visit, indicating participants may have harbored parasites below the limit of detection by qPCR.

Interestingly, reads mapping to *Plasmodium ovale* were detected in five plasma samples. Of these five samples, three had the majority of *Plasmodium* reads mapping specifically to the *P. ovale* species. While *P. ovale* infection is not systematically tested for in this cohort (as *P. falciparum* is the dominant human malaria pathogen in Uganda), *P. ovale* has previously been detected in other investigations in this setting[37].

#### *Microbial landscapes across samples*

From the total of 586 samples, 735 unique microbial species were detected (468 bacteria, 238 eukaryota, 42 viruses, and 3 archaea) (**Figure 2**). The most commonly detected microbial species in plasma samples after filtering were *Malassezia restricta* (60 samples, 21%) and *Plasmodium falciparum* (57 samples, 20%). 79 plasma samples had zero microbial species detected (**Supplementary Figure 4**; the bacterial genera detected in plasma samples are tabulated in **Supplementary Table 5**). The most commonly detected microbial species in swab samples after filtering were *Dolosigranulum pigrum* (152 samples, 52%) and *Moraxella catarrhalis* (141 samples, 48%). 2 swab samples had zero microbial species detected (**Supplementary Figure 5**; the bacterial genera detected in swab samples are tabulated in **Supplementary Table 6**). Of the 42 viral species detected across all samples, 26 were human viruses (including the 18 known pathogenic human viruses described above).

For the remainder of this analysis, we focused on the viruses identified in these samples for which we had the highest confidence that detection was likely to be associated with illness. The rationale for not further characterizing the bacterial reads here is two-fold. The significantly lower sample inputs in plasma samples (i.e., multiple orders of magnitude below swab samples) makes it difficult to distinguish a true bacterial detection from a false positive or contaminant. Consistent with many of the detected bacteria being commensals, the most common species were expected skin or mucosa flora in healthy individuals. However, some of these may have

been associated with illness. In plasma samples, the mNGS pipeline identified three cases of *Mycobacterium* and one case of *Rickettsia* (all with genus-level confidence only), as well as two cases of *Pseudomonas aeruginosa* and one case of *Streptococcus mitis*.

**Figure 2E** summarizes the frequency, normalized NT read count, and breadth of genome recovered for each human viral microbe detected at the species level, in both sample types. The three most commonly detected virus species in plasma samples were Pegivirus C (19 detections), Pegivirus A (14 detections), and Enterovirus A (5 detections). Viral co-detection was observed in 15 plasma samples (11 co-detections of Pegivirus A and C; 2 co-detections of Human mastadenovirus C and Pegivirus C; 1 co-detection of Enterovirus A and Human betaherpesvirus 5; 1 co-detection of Hepatitis GB virus B and Pegivirus A and C). The three most commonly detected virus species in nasal swab samples were Rhinovirus C (25 detections), Influenza A virus (14 detections), and Human respirovirus 1 (12 detections). Viral co-detection was observed in four swab samples (Rhinovirus A and B; SARS-CoV-2 and Human respirovirus 1; Human respirovirus 3 and Rhinovirus C; Rhinovirus C and Rotavirus A). Across the viral species detected, we observed increasing coverage breadth with greater normalized NT read counts.

As expected, concordance between viral microbes detected in plasma vs. swab samples was low (**Supplementary Figure 6**). Of the 120 sample pairs in which at least one human virus was detected, we found that 81 pairs had viral microbes in only the swab sample and 19 pairs had viral microbes in only the plasma sample. Among the remaining 20 pairs in which viral microbes were detected in both, the compositions for 8 pairs were identical between the sample types and 12 pairs were discordant. While as expected, respiratory viruses were primarily detected in respiratory swab samples, there were a few instances where respiratory and gastrointestinal viruses were also (or only) detected in plasma samples.

#### *Epidemiology of acute viral pathogens in the cohort study*

Collapsing over specimen types, the most prevalent acute respiratory viral pathogens identified in this cohort were rhinovirus (40 detections), Influenza A (14 detections, all of the H3N2 subtype), parainfluenza (19 detections), RSV (12 detections), and SARS-CoV-2 (11 detections) (**Figure 3B-C**). We first analyzed the temporal distribution of the acute respiratory and GI viral pathogens that were detected by mNGS. Most (9 of 11) of the SARS-CoV-2 cases were detected between May to July 2021, which coincided with when the Delta variant of SARS-CoV-2 was circulating in this population. Interestingly, we found that many other respiratory viruses, notably Influenza A, were also co-circulating in the cohort during this time, consistent with national-level case reports of SARS-CoV-2 and Influenza A (**Figure 3A**). The frequency and composition of respiratory viral pathogens detected varied considerably by age (**Figure 3D**). For example, the majority of rhinovirus, Influenza A, parainfluenza, and RSV detections were in children < 5 years of age. In contrast, the majority of SARS-CoV-2 detections were in individuals 16 years of age or older. While the estimated prevalence of most pathogens among study participants decreased by age, notable exceptions to this trend included SARS-CoV-2, seasonal coronavirus, and adenovirus (**Supplementary Figure 7**).

Clinical presentations varied by pathogen group and age (**Figure 4**). While there was considerable heterogeneity within and between pathogen groups, and small sample sizes prevented formal testing for multivariate associations, a few patterns emerged: Influenza A infection was associated with high objective temperatures (9 of 14 visits with  $\geq 38.0^{\circ}\text{C}$ ), cough was reported across the pathogen groups, and the prevalence of headache was highest among participants with SARS-CoV-2 (8 of 11 participants). We also found evidence of clustering of



infections at the household level. In 11 of the 80 households, multiple individuals were infected with the same respiratory pathogen during the sampling period (**Supplementary Table 7**). Of these, 8 of 11 households had the same pathogen detected in multiple members within a two-week period, and 4 of 11 households had a pathogen detected in multiple members on the same day.

The prevalence of acute viral pathogen detection was comparable across malaria infection statuses: qPCR negative (40% with at least one respiratory or gastrointestinal viral infection), qPCR positive (32%), mNGS negative (38%), mNGS positive (40%), negative on both assays (40%), and positive on both assays (36%) (Table 3 and **Supplementary Table 8**).

#### *Genomic characterization of SARS-CoV-2, Influenza A virus, RSV*

Of the 11 study visits where SARS-CoV-2 was detected by mNGS, 9 full genomes were recovered. The 9 full genomes represented multiple variant lineages, including Delta (5), Eta (3), and Alpha (1). The two partial genomes were assigned to the Delta variant lineage as well, though they were not included in downstream phylogenetic analyses. We performed phylogenetic inference of the 9 full genomes along with other recent SARS-CoV-2 genomes obtained from GISAID from the African region and globally (**Figure 5; Supplementary Figure 8A**). A description of the inferred phylogeny is provided in the **Supplementary Results**. We found that the 9 genomes generated as part of this study clustered amongst the viral diversity observed across other Ugandan and African SARS-CoV-2 consensus genomes. The degree of divergence observed between our sequences and other publicly available SARS-CoV-2 consensus genomes was in line with the relatively low density of sampling in the region compared to other locations, implying that lineages likely circulated for longer periods before being sampled via genomic surveillance.

Of the 14 study visits where Influenza A virus (all H3N2 subtype) was detected by mNGS, 9 partial HA gene segments were recovered. We used these 9 HA segments, along with other recent Influenza A H3N2 HA segments obtained from GISAID from the African region and globally, to build a phylogenetic tree (**Figure 6; Supplementary Figure 8B**). A description of the inferred phylogeny is provided in the **Supplementary Results**. We found that the HA sequences generated in this study clustered amongst the viral diversity sampled from Kenya, Zambia, the Democratic Republic of Congo, Mozambique, and South Africa. All 9 HA sequences generated in this study were grouped together in a single clade. The most recent common ancestor of the HA sequences generated as part of this study was inferred to circulate in November 2020 (95% confidence interval (CI): October 2020 to November 2020). The shape of our inferred tree was consistent with the 'ladder-like phylogeny' associated with continual immune selection that has previously been described for the HA gene of Influenza A H3N2[38,39].

Of the 12 study visits where RSV was detected by mNGS, 9 full genomes were recovered. The 9 full genomes and 2 additional partial genomes were of the RSV-A subtype, with one partial genome of the RSV-B subtype. We used the 9 full genomes, along with other recent RSV genomes obtained from GISAID from the African region and globally, to build a phylogenetic tree (**Figure 7; Supplementary Figure 8C**). A description of the inferred phylogeny is provided in the **Supplementary Results**. The RSV sequences generated as part of this study fell into 3 distinct clades. The inferred date for the most recent common ancestor of the RSV sequences generated as part of this study was September 2012 (95% CI: August 2010 to July 2013). This diversity among the RSV samples, illustrated through the lack of a common ancestor until

almost 10 years prior to sampling, is likely explained by the very low density of RSV sampling in the region.

## Discussion

Here, we performed a comprehensive and systematic study of over 300 non-malarial febrile illnesses in a representative cohort from eastern Uganda, using mNGS on plasma and respiratory swabs collected between December 2020 to August 2021. We were able to detect a viral pathogen in half of the illnesses occurring in young children, decreasing with age to just over one quarter for adults, for an average of 39% of illnesses overall. We identified the co-circulation of several important respiratory pathogens during this time period, including SARS-CoV-2, Influenza A (H3N2 subtype), and RSV. The composition of respiratory viral pathogens that were detected varied considerably by age, and to a lesser extent, by time. While respiratory viruses were primarily detected in respiratory swab samples as expected, there were instances in which respiratory and GI viruses were also (or only) detected in plasma samples, which could occur if a localized infection becomes systemic. In addition to detecting the likely causes of a number of illnesses, we were able to obtain consensus genomes from mNGS data for SARS-CoV-2, Influenza A, and RSV, and to relate them to other publicly available genomes from the region and globally.

A number of epidemiologic and genomic trends emerge from this well-characterized data set. The timing of this study (i.e., during the first 8 months of 2021) coincides with the implementation of social distancing measures as a result of the global SARS-CoV-2 pandemic. Reductions in incidence, as well as shifts in timing, have been reported worldwide during the pandemic for other respiratory viruses such as influenza and RSV[40–44]. Resurgences following the subsequent lifting of social distancing measures have also been documented, driven by age-dependent patterns of immunity to different pathogens in a population[45–48]. Here, we identified the co-circulation of multiple respiratory pathogens in this cohort, including SARS-CoV-2, Influenza A, and RSV. Interestingly, the number of detections of Influenza A and RSV were larger than the number of detections of SARS-CoV-2 during this study's time period. While respiratory viral surveillance is limited in this setting, our findings on the temporal trends of Influenza A in this cohort are broadly consistent with data from the WHO Global Influenza Surveillance and Response System[49], which detected the H3 subtype of Influenza A circulating in Uganda during this time period. Direct comparison of data from the SARS-CoV-2 and influenza public health surveillance systems suggest that the case counts of these infections differ by several orders of magnitude. However, the systematic data from this study, while limited in scope, suggest that the relative numbers of cases may be much more similar. The degree of divergence observed between the SARS-CoV-2, Influenza A virus, and RSV sequences generated as part of this study and other publicly available sequences was in line with the relatively low density of sampling in the region. Lineages likely circulated for longer periods before being sampled via genomic surveillance. In particular, our ability to interpret the high diversity within our RSV sequences was limited by the sparsity of contextual sequences available.

We were also able to compare the detection of sub-microscopic malaria by qPCR and by mNGS. *Plasmodium falciparum* was detected in 57 plasma samples by mNGS, of which only 22 were previously characterized as positive by qPCR. Among samples with a non-zero value on both assays, we found a positive trend between qPCR parasite densities and mNGS NT rPMs, and samples with NT rPMs above a threshold value were all positive by qPCR. These findings suggest that, even for these malaria infections that we know *a priori* to have low parasite densities, the results from this unbiased, pan-pathogen mNGS approach are correlated with

results from a targeted, pathogen-specific assay. However, there were discrepancies between the qPCR and mNGS results in both directions, which is not unexpected since qPCR analyzed extracted DNA (in whole blood) while our mNGS strategy targeted RNA (in plasma), and these may have different abundances in biological samples.

There are a number of important caveats associated with the design of this study. First, the temporal window of sampling was limited and took place during a pandemic. As a result, these findings may not be representative of the causes of non-malarial fevers outside of the pandemic. Second, we only collected plasma and respiratory swabs, so are likely to have missed other potential causes of fevers that require additional specimen types to detect (i.e., stool samples for GI pathogens). Third, as we only collected samples from malaria blood smear-negative visits, we did not have the opportunity to test at febrile, malaria blood smear-positive visits for the presence of other pathogens causatively associated with fever. These limitations can theoretically be overcome with broader sample collection efforts. Lastly, we were unable to estimate the contribution of bacterial microbes to non-malarial fevers due to the difficulty of distinguishing bacterial microbes that were pathogenic from those that were commensal or contaminants. To address this key issue, we have started collecting convalescent samples from participants to establish background microbiome models. Important avenues of this future investigation include characterizing the microbiome and the prevalence of bacterial infections, investigating viral-bacterial interactions[50,51], and performing surveillance for antimicrobial resistance genes[52].

Another important limitation is the unknown sensitivity of this mNGS assay to detect infection, which may vary by pathogen[53] and poses a challenge in analyzing the absolute and relative incidence of different pathogens. A potentially important factor affecting the sensitivity is that RNA sequencing can lead to differential expression of genomic regions depending on RNA quality. However, positive correlations between NT rPMs from mNGS (which report the relative abundance of sequencing reads mapping to a specific microbe in a sample) and “gold standard” measurements (i.e., viral loads for SARS-CoV-2[12] and other respiratory viruses[54], or qPCR parasite densities for malaria as presented in this work) suggest that thresholds can nonetheless be identified for specific pathogens. This would require testing with well-characterized assays to establish the sensitivity of mNGS to detect a particular pathogen which, while not trivial, would be straightforward and greatly improve the interpretability of these data.

More broadly, this analysis underscores the utility and potential of multiplexed pathogen detection as a tool for diagnosis or surveillance and for better understanding the overall burden of different pathogens (e.g., mNGS, the BioFire® RP2.1 Panel[55], or other multiplexed viral detection assays[56], as well as the potential complementary role of multiplexed pathogen serologic surveillance[57,58]). In addition, the ability to generate whole viral genomes through mNGS could be leveraged to fill in existing gaps in pathogen genomic data from resource-limited settings for important pathogens. Continuing to refine our understanding of the pathogen landscape of non-malarial febrile illness[4,59] in different settings and age groups could open the way to inform control interventions and case management guidelines, allow for the implementation and design of new rapid, low-cost diagnostics to inform clinical decision-making, and improve public health surveillance systems.

## References

1. Malaria. [cited 9 Jun 2022]. Available: <https://www.who.int/news-room/fact-sheets/detail/malaria>
2. Fountain A, Ye Y, Roca-Feltrer A, Rowe AK, Camara A, Fofana A, et al. Surveillance as a Core Intervention to Strengthen Malaria Control Programs in Moderate to High Transmission Settings. *Am J Trop Med Hyg.* 2022;-1. doi:10.4269/ajtmh.22-0181
3. Rodriguez-Barraquer I, Arinaitwe E, Jagannathan P, Kanya MR, Rosenthal PJ, Rek J, et al. Quantification of anti-parasite and anti-disease immunity to malaria as a function of age and exposure. *Elife.* 2018;7. doi:10.7554/eLife.35832
4. Wainaina M, Vey da Silva DA, Dohoo I, Mayer-Scholl A, Roesel K, Hofreuter D, et al. A systematic review and meta-analysis of the aetiological agents of non-malarial febrile illnesses in Africa. *PLoS Negl Trop Dis.* 2022;16: e0010144. doi:10.1371/journal.pntd.0010144
5. Caliendo AM, Gilbert DN, Ginocchio CC, Hanson KE, May L, Quinn TC, et al. Better tests, better care: improved diagnostics for infectious diseases. *Clin Infect Dis.* 2013;57 Suppl 3: S139–70. doi:10.1093/cid/cit578
6. Keitel K, Samaka J, Masimba J, Temba H, Said Z, Kagoro F, et al. Safety and Efficacy of C-reactive Protein-guided Antibiotic Use to Treat Acute Respiratory Infections in Tanzanian Children: A Planned Subgroup Analysis of a Randomized Controlled Noninferiority Trial Evaluating a Novel Electronic Clinical Decision Algorithm (ePOCT). *Clin Infect Dis.* 2019;69: 1926–1934. doi:10.1093/cid/ciz080
7. Bohl JA, Lay S, Chea S, Ah Yong V, Parker DM, Gallagher S, et al. Discovering disease-causing pathogens in resource-scarce Southeast Asia using a global metagenomic pathogen monitoring system. *bioRxiv.* 2021. doi:10.1101/2021.09.25.21262905
8. Gu W, Miller S, Chiu CY. Clinical Metagenomic Next-Generation Sequencing for Pathogen Detection. *Annu Rev Pathol.* 2019;14: 319–338. doi:10.1146/annurev-pathmechdis-012418-012751
9. Almeida A, Mitchell AL, Boland M, Forster SC, Gloor GB, Tarkowska A, et al. A new genomic blueprint of the human gut microbiota. *Nature.* 2019;568: 499–504. doi:10.1038/s41586-019-0965-1
10. Saha S, Ramesh A, Kalantar K, Malaker R, Hasanuzzaman M, Khan LM, et al. Unbiased Metagenomic Sequencing for Pediatric Meningitis in Bangladesh Reveals Neuroinvasive Chikungunya Virus Outbreak and Other Unrealized Pathogens. *MBio.* 2019;10. doi:10.1128/mBio.02877-19
11. Bohl JA, Lay S, Chea S, Ah Yong V, Parker DM, Gallagher S, et al. Discovering disease-causing pathogens in resource-scarce Southeast Asia using a global metagenomic pathogen monitoring system. *Proc Natl Acad Sci U S A.* 2022;119: e2115285119. doi:10.1073/pnas.2115285119
12. Mick E, Kamm J, Pisco AO, Ratnasiri K, Babik JM, Castañeda G, et al. Upper airway gene expression reveals suppressed immune responses to SARS-CoV-2 compared with other

- respiratory viruses. *Nat Commun.* 2020;11: 5854. doi:10.1038/s41467-020-19587-y
13. Ko KKK, Chng KR, Nagarajan N. Metagenomics-enabled microbial surveillance. *Nat Microbiol.* 2022;7: 486–496. doi:10.1038/s41564-022-01089-w
  14. Ramesh A, Nakielny S, Hsu J, Kyohere M, Byaruhanga O, de Bourcy C, et al. Metagenomic next-generation sequencing of samples from pediatric febrile illness in Tororo, Uganda. *PLoS One.* 2019;14: e0218318. doi:10.1371/journal.pone.0218318
  15. Phan MVT, Agoti CN, Munywoki PK, Otieno GP, Ngama M, Kellam P, et al. Identification of missed viruses by metagenomic sequencing of clinical respiratory samples from Kenya. *Sci Rep.* 2022;12: 202. doi:10.1038/s41598-021-03987-1
  16. Yek C, Nam VS, Leang R, Parker DM, Heng S, Souv K, et al. The Pandemic Experience in Southeast Asia: Interface Between SARS-CoV-2, Malaria, and Dengue. *Front Trop Dis.* 2021;2. doi:10.3389/fitd.2021.788590
  17. Nankabirwa J, Bousema T, Blanken SL, Rek J, Arinaitwe E, Greenhouse B, et al. Measures of malaria transmission, infection, and disease in an area bordering two districts with and without sustained indoor residual spraying of insecticide in Uganda. 2022. doi:10.21203/rs.3.rs-1472796/v1
  18. Uganda Clinical Guidelines 2016. [cited 23 Jun 2022]. Available: <http://library.health.go.ug/publications/guidelines/uganda-clinical-guidelines-2016>
  19. Hofmann N, Mwingira F, Shekalaghe S, Robinson LJ, Mueller I, Felger I. Ultra-sensitive detection of *Plasmodium falciparum* by amplification of multi-copy subtelomeric targets. *PLoS Med.* 2015;12: e1001788. doi:10.1371/journal.pmed.1001788
  20. Kalantar KL, Carvalho T, de Bourcy CFA, Dimitrov B, Dingle G, Egger R, et al. IDseq-An open source cloud-based pipeline and analysis service for metagenomic pathogen detection and monitoring. *Gigascience.* 2020;9. doi:10.1093/gigascience/giaa111
  21. Dobin A, Davis CA, Schlesinger F, Drenkow J, Zaleski C, Jha S, et al. STAR: ultrafast universal RNA-seq aligner. *Bioinformatics.* 2013;29: 15–21. doi:10.1093/bioinformatics/bts635
  22. Ruby JG, Bellare P, Derisi JL. PRICE: software for the targeted assembly of components of (Meta) genomic sequence data. *G3.* 2013;3: 865–880. doi:10.1534/g3.113.005967
  23. Bolger AM, Lohse M, Usadel B. Trimmomatic: a flexible trimmer for Illumina sequence data. *Bioinformatics.* 2014;30: 2114–2120. doi:10.1093/bioinformatics/btu170
  24. Wu TD, Nacu S. Fast and SNP-tolerant detection of complex variants and splicing in short reads. *Bioinformatics.* 2010;26: 873–881. doi:10.1093/bioinformatics/btq057
  25. Ye Y, Choi J-H, Tang H. RAPSearch: a fast protein similarity search tool for short reads. *BMC Bioinformatics.* 2011;12: 159. doi:10.1186/1471-2105-12-159
  26. Li H. Minimap2: pairwise alignment for nucleotide sequences. *Bioinformatics.* 2018;34: 3094–3100. doi:10.1093/bioinformatics/bty191
  27. Krueger F. TrimGalore: A wrapper around Cutadapt and FastQC to consistently apply

- adapter and quality trimming to FastQ files, with extra functionality for RRBS data. Github; Available: <https://github.com/FelixKrueger/TrimGalore>
28. Grubaugh ND, Gangavarapu K, Quick J, Matteson NL, De Jesus JG, Main BJ, et al. An amplicon-based sequencing framework for accurately measuring intrahost virus diversity using PrimalSeq and iVar. *bioRxiv*. 2018. p. 383513. doi:10.1101/383513
  29. iVar: iVar is a computational package that contains functions broadly useful for viral amplicon-based sequencing. Github; Available: <https://github.com/andersen-lab/ivar>
  30. Influenza A virus (A/New York/392/2004(H3N2)). [cited 26 Apr 2022]. Available: [https://www.ncbi.nlm.nih.gov/genome/10290?genome\\_assembly\\_id=899994](https://www.ncbi.nlm.nih.gov/genome/10290?genome_assembly_id=899994)
  31. Hadfield J, Megill C, Bell SM, Huddleston J, Potter B, Callender C, et al. Nextstrain: real-time tracking of pathogen evolution. *Bioinformatics*. 2018;34: 4121–4123. doi:10.1093/bioinformatics/bty407
  32. Khare S, Gurry C, Freitas L, Schultz MB, Bach G, Diallo A, et al. GISAID's Role in Pandemic Response. *China CDC Wkly*. 2021;3: 1049–1051. doi:10.46234/ccdcw2021.255
  33. Shu Y, McCauley J. GISAID: Global initiative on sharing all influenza data - from vision to reality. *Euro Surveill*. 2017;22. doi:10.2807/1560-7917.ES.2017.22.13.30494
  34. Katoh K, Standley DM. MAFFT multiple sequence alignment software version 7: improvements in performance and usability. *Mol Biol Evol*. 2013;30: 772–780. doi:10.1093/molbev/mst010
  35. Nguyen L-T, Schmidt HA, von Haeseler A, Minh BQ. IQ-TREE: a fast and effective stochastic algorithm for estimating maximum-likelihood phylogenies. *Mol Biol Evol*. 2015;32: 268–274. doi:10.1093/molbev/msu300
  36. Sagulenko P, Puller V, Neher RA. TreeTime: Maximum-likelihood phylodynamic analysis. *Virus Evol*. 2018;4: vex042. doi:10.1093/ve/vex042
  37. Asua V, Tukwasibwe S, Conrad M, Walakira A, Nankabirwa JI, Mugenyi L, et al. Plasmodium Species Infecting Children Presenting with Malaria in Uganda. *Am J Trop Med Hyg*. 2017;97: 753–757. doi:10.4269/ajtmh.17-0345
  38. Grenfell BT, Pybus OG, Gog JR, Wood JLN, Daly JM, Mumford JA, et al. Unifying the epidemiological and evolutionary dynamics of pathogens. *Science*. 2004;303: 327–332. doi:10.1126/science.1090727
  39. Volz EM, Koelle K, Bedford T. Viral phylodynamics. *PLoS Comput Biol*. 2013;9: e1002947. doi:10.1371/journal.pcbi.1002947
  40. Olsen SJ, Winn AK, Budd AP, Prill MM, Steel J, Midgley CM, et al. Changes in influenza and other respiratory virus activity during the COVID-19 pandemic - United States, 2020-2021. *MMWR Morb Mortal Wkly Rep*. 2021;70: 1013–1019. doi:10.15585/mmwr.mm7029a1
  41. Olsen SJ, Azziz-Baumgartner E, Budd AP, Brammer L, Sullivan S, Pineda RF, et al. Decreased Influenza Activity During the COVID-19 Pandemic - United States, Australia, Chile, and South Africa, 2020. *MMWR Morb Mortal Wkly Rep*. 2020;69: 1305–1309.

doi:10.15585/mmwr.mm6937a6

42. Tempia S, Walaza S, Bhiman JN, McMorrow ML, Moyes J, Mkhencele T, et al. Decline of influenza and respiratory syncytial virus detection in facility-based surveillance during the COVID-19 pandemic, South Africa, January to October 2020. *Euro Surveill.* 2021;26. doi:10.2807/1560-7917.ES.2021.26.29.2001600
43. Stamm P, Sagoschen I, Weise K, Plachter B, Münzel T, Gori T, et al. Influenza and RSV incidence during COVID-19 pandemic-an observational study from in-hospital point-of-care testing. *Med Microbiol Immunol.* 2021;210: 277–282. doi:10.1007/s00430-021-00720-7
44. Fricke LM, Glöckner S, Dreier M, Lange B. Impact of non-pharmaceutical interventions targeted at COVID-19 pandemic on influenza burden - a systematic review. *J Infect.* 2021;82: 1–35. doi:10.1016/j.jinf.2020.11.039
45. Engels G, Sack J, Weissbrich B, Hartmann K, Knies K, Härtel C, et al. Very Low Incidence of SARS-CoV-2, Influenza and RSV but High Incidence of Rhino-, Adeno- and Endemic Coronaviruses in Children With Acute Respiratory Infection in Primary Care Pediatric Practices During the Second and Third Wave of the SARS-CoV-2 Pandemic. *Pediatr Infect Dis J.* 2022;41: e146–e148. doi:10.1097/INF.0000000000003460
46. Kuitunen I, Artama M, Haapanen M, Renko M. Rhinovirus spread in children during the COVID-19 pandemic despite social restrictions-A nationwide register study in Finland. *J Med Virol.* 2021;93: 6063–6067. doi:10.1002/jmv.27180
47. Ujiiie M, Tsuzuki S, Nakamoto T, Iwamoto N. Resurgence of Respiratory Syncytial Virus Infections during COVID-19 Pandemic, Tokyo, Japan. *Emerg Infect Dis.* 2021;27: 2969–2970. doi:10.3201/eid2711.211565
48. Amar S, Avni YS, O'Rourke N, Michael T. Prevalence of Common Infectious Diseases After COVID-19 Vaccination and Easing of Pandemic Restrictions in Israel. *JAMA Netw Open.* 2022;5: e2146175. doi:10.1001/jamanetworkopen.2021.46175
49. Flunet. [cited 5 Jul 2022]. Available: <https://www.who.int/tools/flunet>
50. Bosch AATM, Biesbroek G, Trzcinski K, Sanders EAM, Bogaert D. Viral and bacterial interactions in the upper respiratory tract. *PLoS Pathog.* 2013;9: e1003057. doi:10.1371/journal.ppat.1003057
51. Korten I, Mika M, Klenja S, Kieninger E, Mack I, Barbani MT, et al. Interactions of Respiratory Viruses and the Nasal Microbiota during the First Year of Life in Healthy Infants. *mSphere.* 2016;1. doi:10.1128/mSphere.00312-16
52. Chiu CY, Miller SA. Clinical metagenomics. *Nat Rev Genet.* 2019;20: 341–355. doi:10.1038/s41576-019-0113-7
53. Hirsch HH. Spatiotemporal Virus Surveillance for Severe Acute Respiratory Infections in Resource-limited Settings: How Deep Need We Go? *Clinical infectious diseases: an official publication of the Infectious Diseases Society of America.* 2019. pp. 1126–1128. doi:10.1093/cid/ciy663
54. Fischer N, Indenbirken D, Meyer T, Lütgehetmann M, Lellek H, Spohn M, et al. Evaluation

- of Unbiased Next-Generation Sequencing of RNA (RNA-seq) as a Diagnostic Method in Influenza Virus-Positive Respiratory Samples. *J Clin Microbiol.* 2015;53: 2238–2250. doi:10.1128/JCM.02495-14
55. BioFire® FilmArray® Respiratory 2.1 Panel. In: BioFire Diagnostics [Internet]. 7 Apr 2021 [cited 24 May 2022]. Available: <https://www.biofire.com/products/the-filmarray-panels/filmarrayrp/>
  56. Office of the Commissioner. Coronavirus (COVID-19) Update: FDA Authorizes First COVID-19 Test Available without a Prescription That Also Detects Flu and RSV. In: U.S. Food and Drug Administration [Internet]. FDA; [cited 24 May 2022]. Available: <https://www.fda.gov/news-events/press-announcements/coronavirus-covid-19-update-fda-authorizes-first-covid-19-test-available-without-prescription-also>
  57. Xu GJ, Kula T, Xu Q, Li MZ, Vernon SD, Ndung'u T, et al. Viral immunology. Comprehensive serological profiling of human populations using a synthetic human virome. *Science.* 2015;348: aaa0698. doi:10.1126/science.aaa0698
  58. Metcalf CJE, Farrar J, Cutts FT, Basta NE, Graham AL, Lessler J, et al. Use of serological surveys to generate key insights into the changing global landscape of infectious disease. *Lancet.* 2016;388: 728–730. doi:10.1016/S0140-6736(16)30164-7
  59. D'Acremont V, Kilowoko M, Kyungu E, Philipina S, Sangu W, Kahama-Maró J, et al. Beyond malaria--causes of fever in outpatient Tanzanian children. *N Engl J Med.* 2014;370: 809–817. doi:10.1056/NEJMoa1214482
  60. Covid-19. [cited 5 Jul 2022]. Available: <https://covid19.gou.go.ug/statistics.html>



## **Acknowledgements**

We thank all study participants who took part in this study. We also thank the clinical, laboratory, and data study team and the Infectious Diseases Research Collaboration for administrative and technical support. We acknowledge Maíra Phelps from the Chan Zuckerberg Biohub for assistance with sample coordination, Dan Lu from Chan Zuckerberg Initiative for assistance with the GISAID upload, and the Genomic Team at the Chan Zuckerberg Biohub for assistance with sequencing: Norma Neff, Angela Detweiler, Honey Mekonen and Sheryl Paul.

We acknowledge sources of funding support, including from the Schmidt Science Fellows, in partnership with the Rhodes Trust (ST); Chan Zuckerberg Biohub Investigator program (IRB, BG); NIH/NIAID U19AI089674 (JR, IS, MK, GD, PJ, IRB, BG); NIH/NIAID U01AI150741 (ST, PJ, IRB, BG).

## **Competing Interests**

The authors have no competing interests to declare.

## Tables

**Table 1: Demographic and clinical characteristics of the study participants.** The top 4 most prevalent reported symptoms are listed. A “cannot assess” designation could have been given for symptom reporting in young children. \*These participants had a rash and no fever. \*\*Three additional NP swabs and two additional plasma specimens were collected but did not pass QC.

| <b>Individuals (N = 212)</b>                                             |                                                                                    |
|--------------------------------------------------------------------------|------------------------------------------------------------------------------------|
| Age at cohort study enrollment                                           | < 5 years: 105 (49.5%)<br>5-15 years: 44 (20.8%)<br>16 years or older: 63 (29.7%)  |
| Sex                                                                      | Female: 128 (60.4%)<br>Male: 84 (39.6%)                                            |
| District                                                                 | Tororo: 159 (75.0%)<br>Busia: 53 (25.0%)                                           |
| Number of visits with mNGS sample collection                             | 1: 149 (70.3%)<br>2: 36 (17.0%)<br>3: 20 (9.4%)<br>4: 3 (1.4%)<br>5: 4 (1.9%)      |
| Number of unique households                                              | 80                                                                                 |
| <b>Study visits with sample collection (N = 313)</b>                     |                                                                                    |
| Date range                                                               | December 14, 2020 - August 22, 2021                                                |
| Malaria blood smear result                                               | Positive: 1 (0.3%)<br>Negative: 309 (98.7%)<br>Not done*: 3 (1.0%)                 |
| <i>Plasmodium falciparum</i> malaria qPCR result                         | Positive: 74 (23.6%)<br>Negative: 238 (76.0%)<br>Not done: 1 (0.3%)                |
| Objective temperature at study visit                                     | < 37.5°C: 215 (68.7%)<br>37.5 - 38.0°C: 47 (15.0%)<br>≥ 38.0°C: 51 (16.3%)         |
| Symptom reported: fever                                                  | Yes: 310 (99.0%)<br>No: 3 (1.0%)*                                                  |
| Symptom reported: cough                                                  | Yes: 187 (59.7%)<br>No: 126 (40.3%)                                                |
| Symptom reported: headache                                               | Yes: 76 (24.3%)<br>No: 213 (68.1%)<br>Cannot assess: 24 (7.7%)                     |
| Symptom reported: fatigue                                                | Yes: 36 (11.5%)<br>No: 267 (85.3%)<br>Cannot assess: 10 (3.2%)                     |
| mNGS specimens collected at study visit and included in final analysis** | NP swab & plasma: 273 (87.2%)<br>NP swab only: 21 (6.7%)<br>Plasma only: 19 (6.1%) |

**Table 2: mNGS detection of microbes and viral pathogens at study visits.** Refer to Supplementary Table 3 for the list of viral pathogens considered. \*A co-detection with a respiratory viral pathogen was detected at 1 visit.

| <b>Microbes detected at visit</b>        | <b>At all study visits<br/>N = 313 visits</b> | <b>At visits with paired swab and plasma<br/>N = 273 visits</b> |
|------------------------------------------|-----------------------------------------------|-----------------------------------------------------------------|
| No microbes                              | 10                                            | 2                                                               |
| Bacteria only                            | 44                                            | 40                                                              |
| Virus only                               | 3                                             | 1                                                               |
| Eukaryota only                           | 8                                             | 1                                                               |
| Bacteria + virus                         | 59                                            | 46                                                              |
| Bacteria + eukaryota                     | 104                                           | 102                                                             |
| Virus + eukaryota                        | 4                                             | 1                                                               |
| Bacteria + virus + eukaryota             | 81                                            | 80                                                              |
| <b>Viral pathogens detected at visit</b> | <b>At all study visits<br/>N = 313 visits</b> | <b>At visits with paired swab and plasma<br/>N = 273 visits</b> |
| No respiratory viral pathogens           | 194                                           | 171                                                             |
| 1 respiratory viral pathogen             | 116                                           | 99                                                              |
| 2 respiratory viral pathogens            | 2                                             | 2                                                               |
| 3 respiratory viral pathogens            | 1                                             | 1                                                               |
| No GI viral pathogen                     | 308                                           | 268                                                             |
| 1 GI viral pathogen                      | 5*                                            | 5*                                                              |

**Table 3: Frequency table of detection of *P. falciparum* malaria by mNGS and qPCR at the 273 study visits with paired mNGS sample collection, and co-detection with viral pathogens.** mNGS results for malaria are from the plasma specimen only. The co-detection of respiratory/gastrointestinal viral pathogens (see Supplementary Table 3) in either the plasma or swab specimen are tabulated in the bullet points. The list and frequency of viruses detected are tabulated in Supplementary Table 8.

| <b>N = 273 visits with paired mNGS sample collection</b>  | <b>Malaria qPCR (-)<br/><br/>N = 210 visits</b>                                                      | <b>Malaria qPCR (+)<br/><br/>N = 62 visits</b>                                                      | <b>No malaria qPCR available<br/><br/>N = 1 visit</b>                                            |
|-----------------------------------------------------------|------------------------------------------------------------------------------------------------------|-----------------------------------------------------------------------------------------------------|--------------------------------------------------------------------------------------------------|
| <b>Malaria mNGS (-) in plasma<br/><br/>N = 216 visits</b> | 176 visits <ul style="list-style-type: none"> <li>71 visits had at least 1 viral pathogen</li> </ul> | 40 visits <ul style="list-style-type: none"> <li>12 visits had at least 1 viral pathogen</li> </ul> | 0 visits                                                                                         |
| <b>Malaria mNGS (+) in plasma<br/><br/>N = 57 visits</b>  | 34 visits <ul style="list-style-type: none"> <li>15 visits had at least 1 viral pathogen</li> </ul>  | 22 visits <ul style="list-style-type: none"> <li>8 visits had at least 1 viral pathogen</li> </ul>  | 1 visit <ul style="list-style-type: none"> <li>0 visits had at least 1 viral pathogen</li> </ul> |

## Figures

**Figure 1: Maps of the study area.** Map of the 136 districts in Uganda, highlighting the two districts included in the PRISM Border Cohort study (Tororo District in red, Busia District in green). The black area represents the 3 parishes from which households were enrolled. The outlines in white reflect district borders. Inset: Map of the PRISM Border Cohort study area. Each point represents 1 household enrolled in the study that had mNGS sample collection performed (80 households in total). Osukuru and Kayoro are 2 of the 88 parishes in Tororo District; Buteba is one of the 63 parishes in Busia District. The outlines in white reflect village borders.

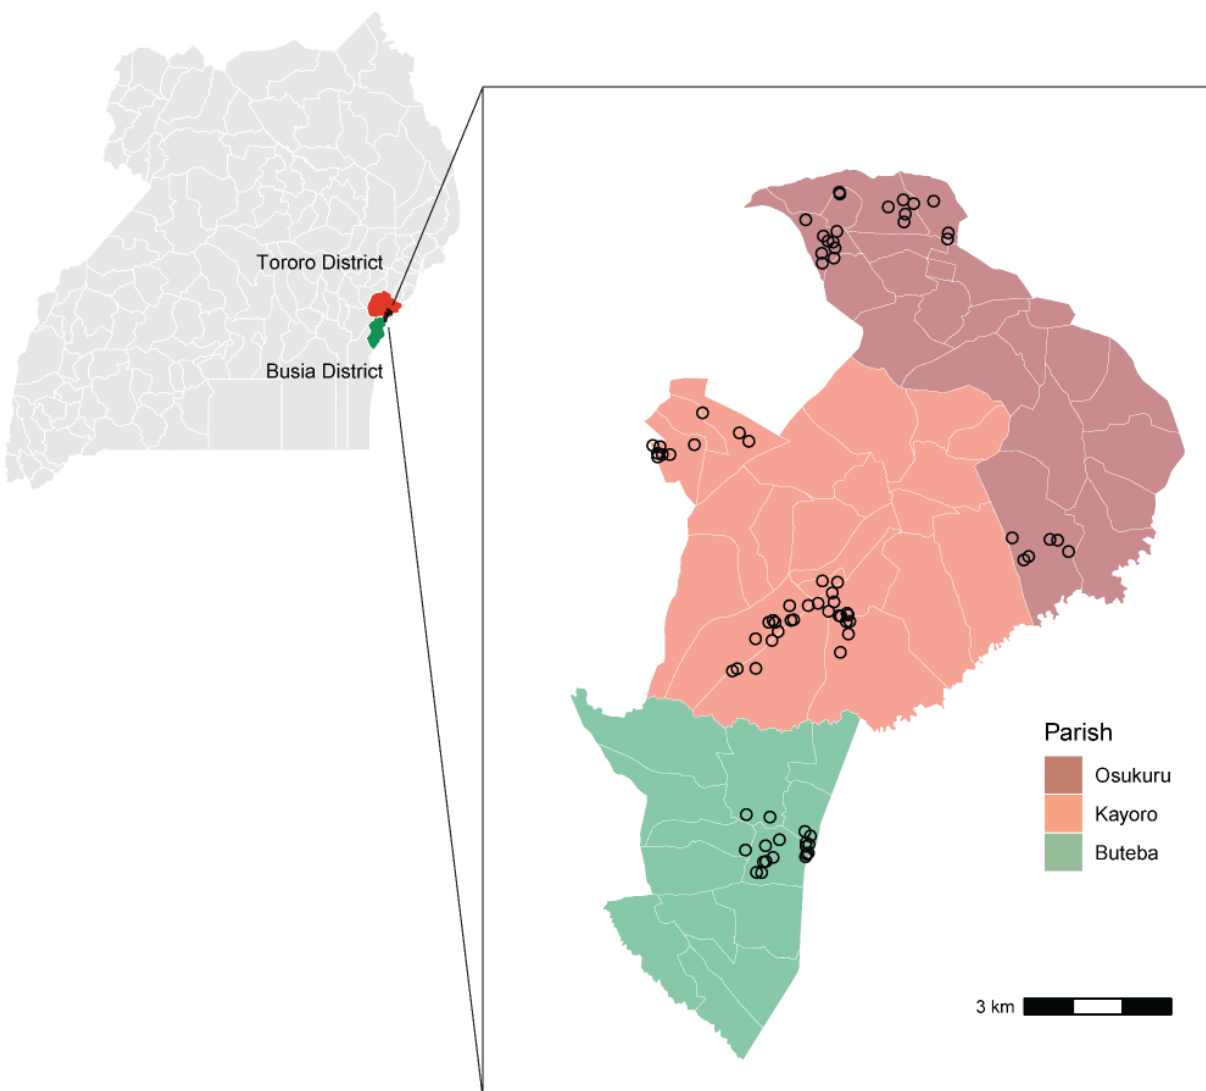

**Figure 2: Overall microbial composition in plasma and swab samples by kingdom, and species-level detection of viral microbes. (A,C)** Pre-filtering and **(B,D)** post-filtering microbial composition in plasma and NP swabs by species-level total nucleotide read counts across all samples, stratified by archaea, bacteria, eukaryota, viruses, and uncategorized. Uncategorized reads include vectors, uncultured microorganisms, uncultured prokaryotes, unidentified soil organisms, otherwise unidentified organisms, and taxa with neither family nor genus classification. Filters applied: NT Z-score  $\geq 1$ , NT rPM  $\geq 10$ , NR rPM  $\geq 5$ , and average NT alignment  $\geq 50$  base pairs. The bacterial reads in all samples with low sample input (i.e.,  $< 25$  pg) were also excluded. **(E)** Species-level human viral microbes detected (y-axis) with their NT rPM (x-axis). The point color denotes the coverage breadth of the particular sample and shape denotes sample type. On the y-axis label, the first value in parenthesis represents the number of unique samples with that viral microbe detected. The second value in parenthesis represents the number of unique participant visits where that viral microbe was detected.

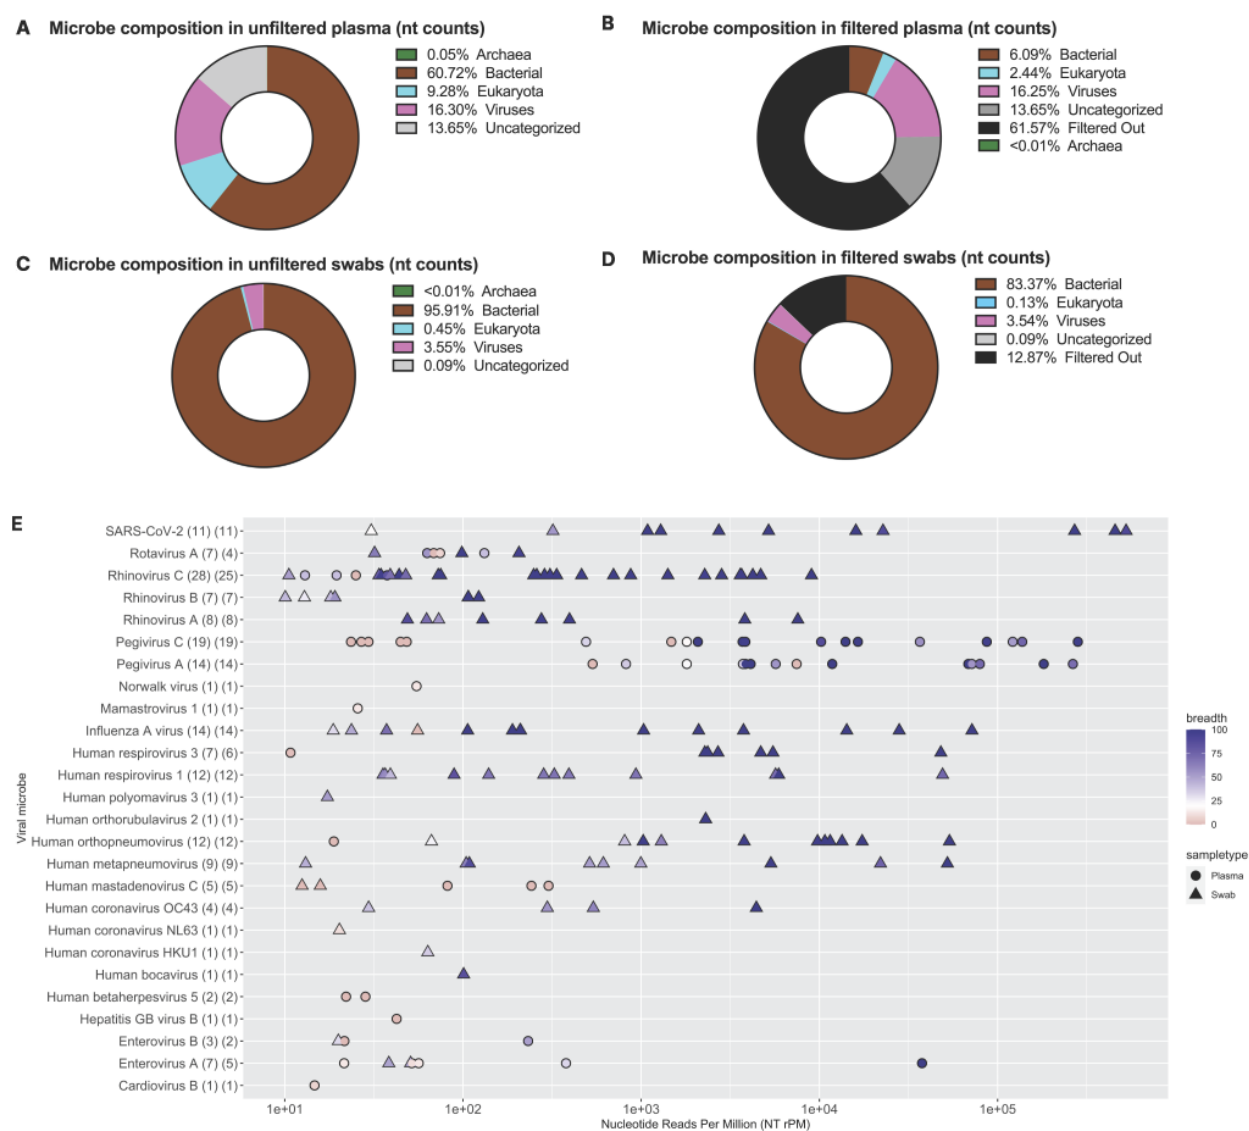

**Figure 3: Respiratory viral pathogens by detection month and age group.** If a virus was detected in both sample types from a given visit, it was counted only once. See legend for number of times each virus was detected in this study. **(A)** Weekly reported case counts of COVID-19 and Influenza A virus (H3 subtypes) in Uganda between December 2, 2020 and August 26, 2021. COVID-19 case counts downloaded from the Ugandan Ministry of Health COVID-19 Response Info Hub database[60]. Influenza case counts shown are the number of specimens positive for Influenza A virus (H3 subtype), downloaded from the World Health Organization’s Global Influenza Surveillance and Response System (GISRS) database[49]. **(B)** Number of human coronaviruses identified. **(C)** Number of additional respiratory viruses identified. Note the differing y-axes in panels B and C. **(D)** Identified pathogens by participant age group, with the same color scale as in previous panels. RSV: respiratory syncytial virus.

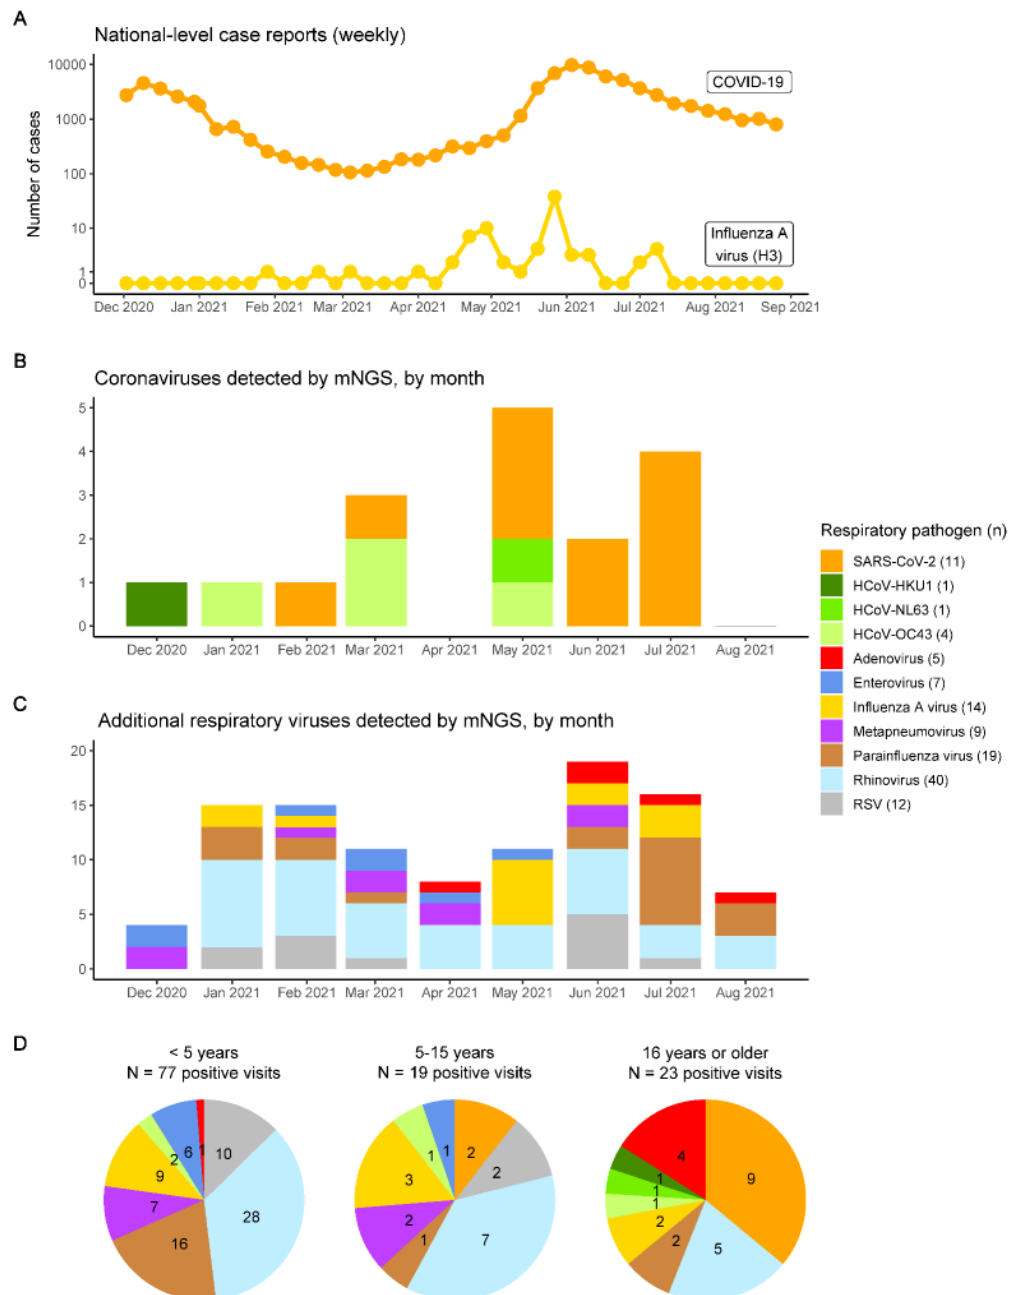

**Figure 4: Participant age, objective temperature, *Plasmodium falciparum* malaria qPCR result, and reported symptoms at each visit where a respiratory or gastrointestinal viral pathogen was detected.** Each column corresponds to a visit. See Supplementary Table 3 for mapping column names (categories) to viral species. Multiple viral pathogens co-detected at the same visit are depicted by matching color cells in the bottom row. NV (last column): norovirus.

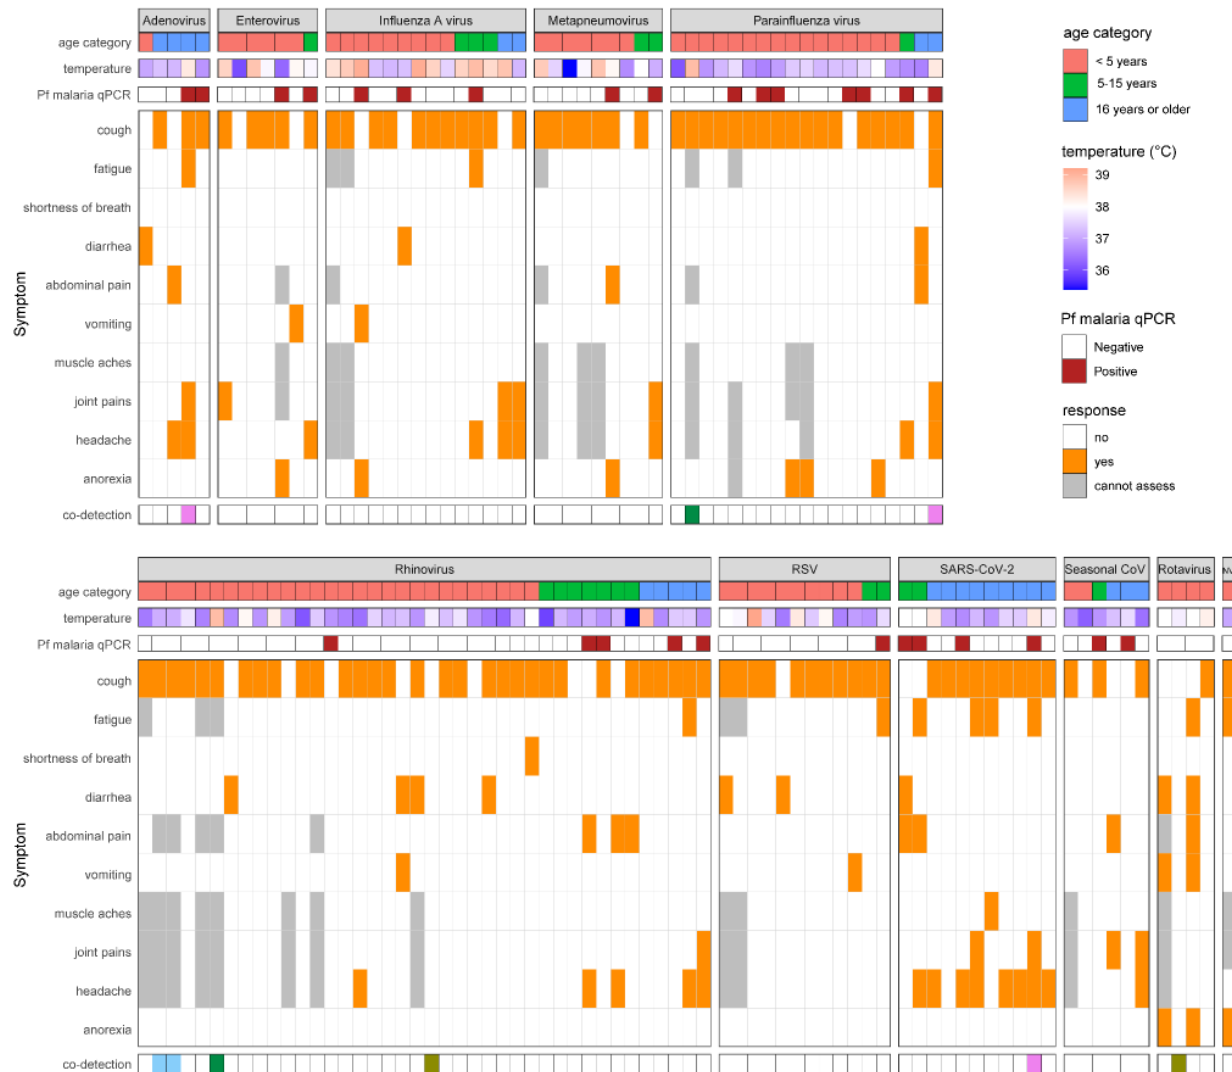



**Figure 5: Phylogeographic analysis of SARS-CoV-2 genomes generated in this mNGS study.** **(A)** Temporally-resolved phylogeny of SARS-CoV-2 genomes based on 2,677 SARS-CoV-2 genomes from the GISAID database closely related to the 9 sequences determined from this study. The 9 sequences determined from this study are shown in black overlaid circles. **(B)** Phylogeny narrowed in on the Delta clade (including 5 genomes from the study). Four of the Delta-lineage viruses fell within a polytomous clade defined by a C10977T mutation. The fifth virus grouped within a different clade of Delta-lineage viruses defined by a G19117T mutation. **(C)** Phylogeny narrowed in on the Eta clade (including 3 genomes from the study). Two viruses grouped together, sharing C4570A, C13536T, C21811T mutations, and were separated by a C21846T mutation that was unique to hCoV-19/Uganda/IDRC-CZB-01/2021. In all panels, tip colors indicate country of origin (legend is shared by panels). Proximity-based subsampling was used on the focal set (i.e., the 9 genomes generated from this study and all Ugandan genomes from GISAID), grouped by year and month, with a maximum of 2,000 sequences.

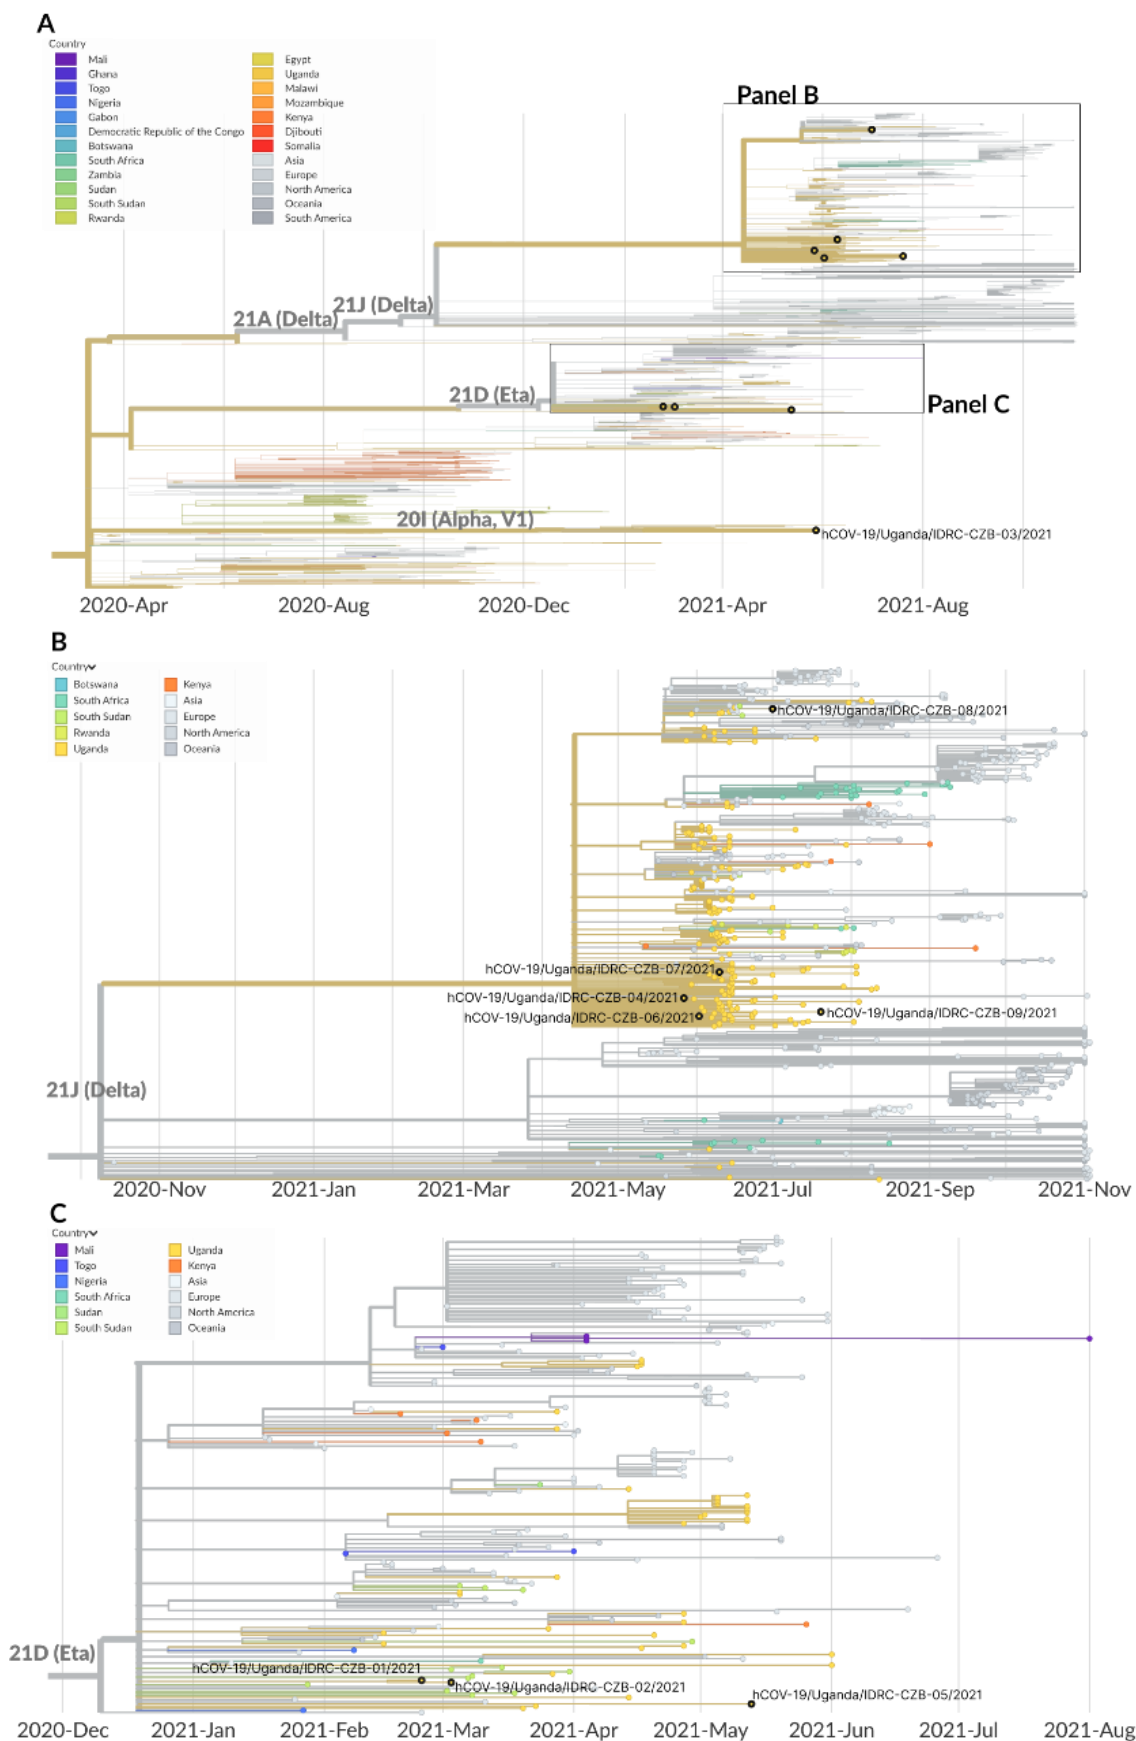

**Figure 6: Phylogeographic analysis of Influenza A (H3N2) genomes generated in this mNGS study.** (A) Temporally-resolved phylogeny of HA genes of Influenza A (H3N2) based on 3,816 Influenza A (H3N2) HA genes from the GISAID database and the 9 HA genes generated from this study. Points in color represent sequences from Africa, and points in greyscale represent sequences from other parts of the world. (B) Phylogeny narrowed in on the samples generated from this study (9 HA genes) in green. All of the HA sequences generated in this study were clustered in a clade defined by C1577T. All samples labeled as “Uganda” are from this study. Sub-sampling was used to get 40 sequences per country per year and month, apart from genomes originating from Africa, which were all included.

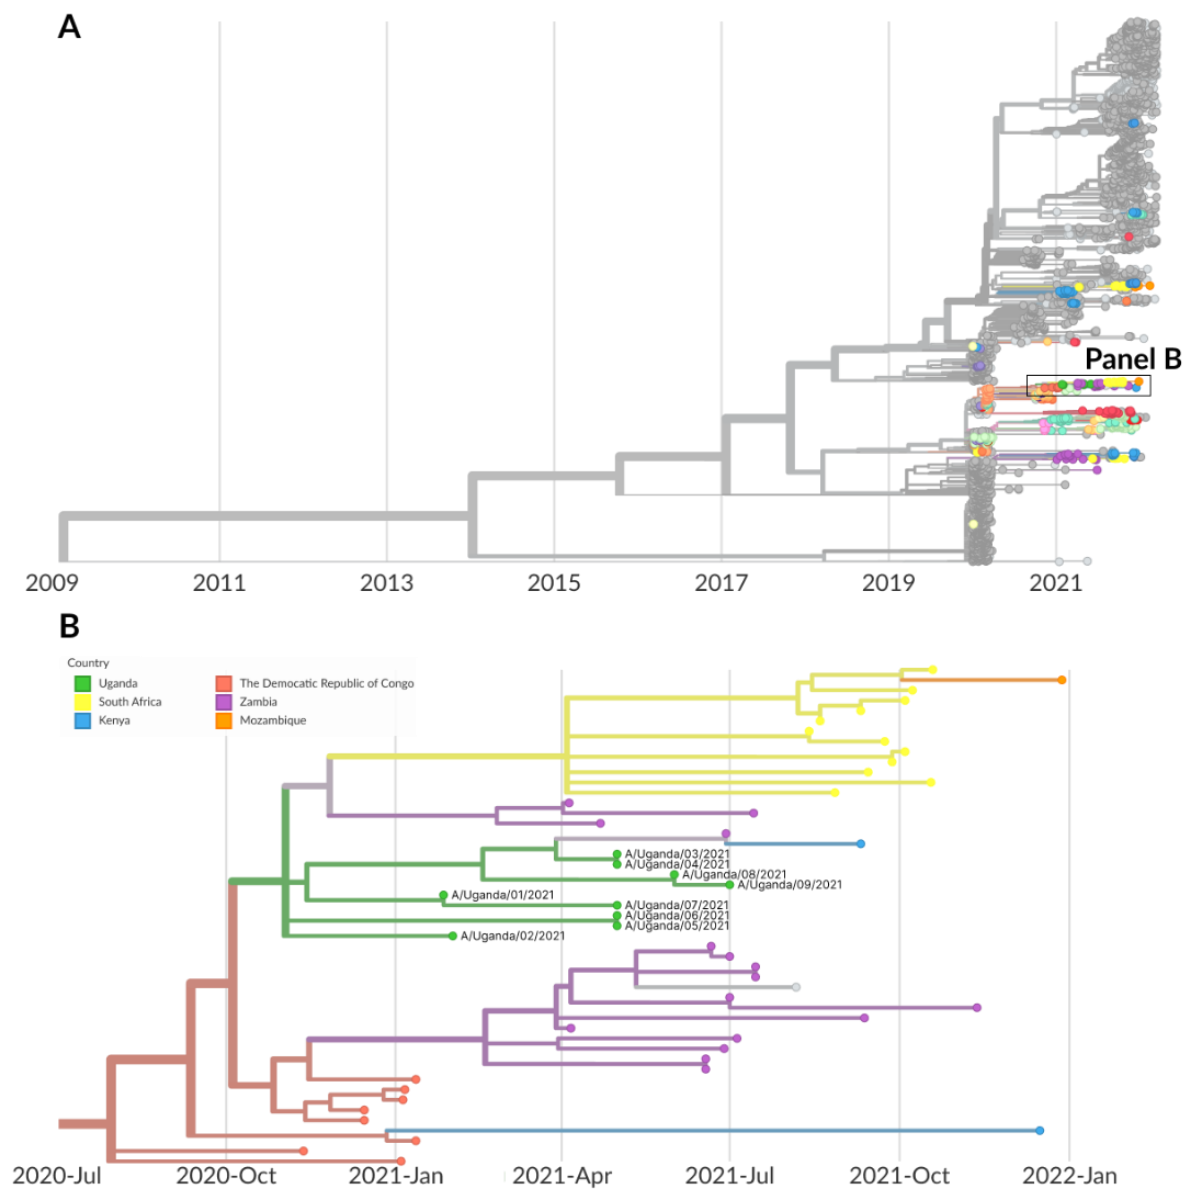

### Figure 7: Phylogeographic analysis of RSV genomes generated in this mNGS study.

Temporally-resolved phylogeny of the RSV genomes generated in this study, based on 460 RSV genomes from the GISAID database and the 9 RSV genomes generated from this study. All samples labeled as “Uganda” are from this study. The tree shows only sequences of the RSV-A subtype; none of the 9 RSV genomes generated in this study were of the RSV-B subtype. Tip colors indicate country of origin: those in color represent sequences from Africa, and those in grayscale represent sequences from other parts of the world. Sub-sampling was used to get 40 sequences per country per year and month, apart from genomes originating from Africa, which were all included. Clade 1 is defined by 7 mutations (T2156C, C5008T, C7184T, G11704A, T1736C, C2129T, T7977C) from the closest basal virus on the tree. Clade 2 is defined by 59 mutations from the closest basal virus on the tree. Clade 3 is defined by 102 mutations from the closest basal virus on the tree.

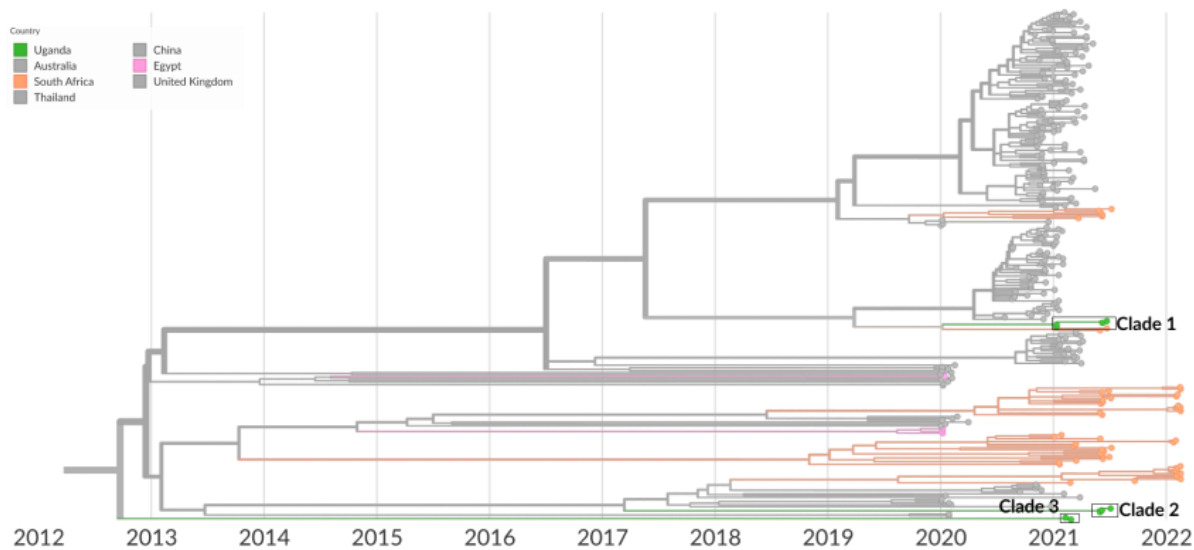

Source: https://www.medrxiv.org/content/10.1101/2022.09.02.22279519v1.full.pdf
